# Supplementary material for: Water-soluble branched polymer for combined chemo-immunotherapy of bacterial infections
Source: Royal Society of Chemistry journal article supplement (doi:10.1039/d1bm01501j), 2021-01-01
Supplement: d1bm01501j1.pdf [file d1bm01501j1.pdf]

## Supporting Information

### **Water-soluble branched polymer for combined chemo-immunotherapy of bacterial infections**

Xiaomei Dai\*, Lele Yang, Qingqing Xu, Jifang Ma, Qiang Zhang, Feng Gao\*

Laboratory of Functionalized Molecular Solids, Ministry of Education, Anhui Key

Laboratory of Chemo/Biosensing, Laboratory of Biosensing and Bioimaging

(LOBAB), College of Chemistry and Materials Science, Anhui Normal University,

Wuhu 241002, P. R. China.

Email: [daixiaomei@mail.ahnu.edu.cn](mailto:daixiaomei@mail.ahnu.edu.cn)

Email:

[fgao@mail.ahnu.edu.cn](mailto:fgao@mail.ahnu.edu.cn)

**Table 1** Physicochemical and MBC/MIC values of poly(MBA-AEPZ)-Agm

| Sample              | Mw(Da) | PDI  | MBC (nmol/L)         |                  | MIC (nmol/L)         |                  | MBC/MIC              |                  |
|---------------------|--------|------|----------------------|------------------|----------------------|------------------|----------------------|------------------|
|                     |        |      | <i>P. aeruginosa</i> | <i>S. aureus</i> | <i>P. aeruginosa</i> | <i>S. aureus</i> | <i>P. aeruginosa</i> | <i>S. aureus</i> |
| Poly(MBA-AEPZ)-Agm1 | 1850   | 1.01 | 1000                 | 1000             | 500                  | 1000             | 2                    | 1                |
| Poly(MBA-AEPZ)-Agm2 | 3354   | 1.56 | 1000                 | 1000             | 500                  | 1000             | 2                    | 1                |
| Poly(MBA-AEPZ)-Agm3 | 5489   | 1.39 | 1000                 | 1000             | 500                  | 1000             | 2                    | 1                |
| Poly(MBA-AEPZ)-Agm4 | 8834   | 1.06 | 1000                 | 1000             | 500                  | 500              | 2                    | 2                |

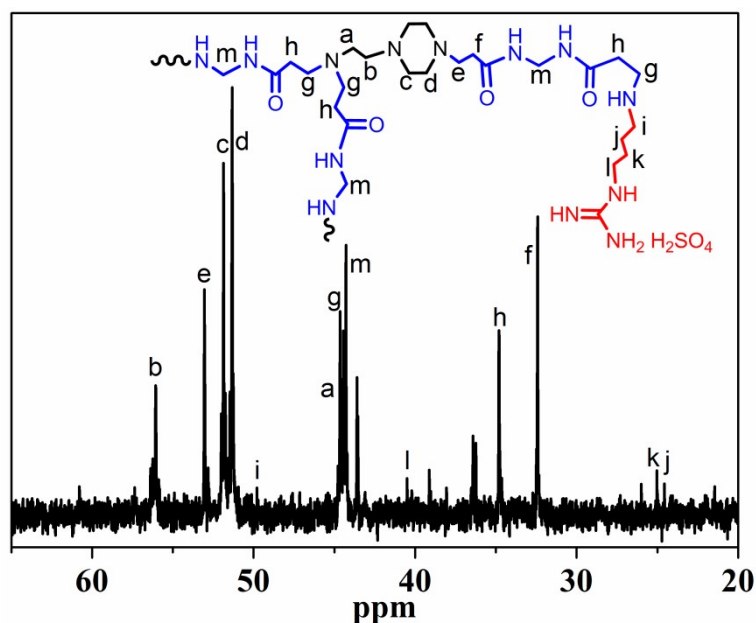

Fig. S1  $^{13}\text{C}$  NMR spectrum of poly(MBA-AEPZ)-Agm1.

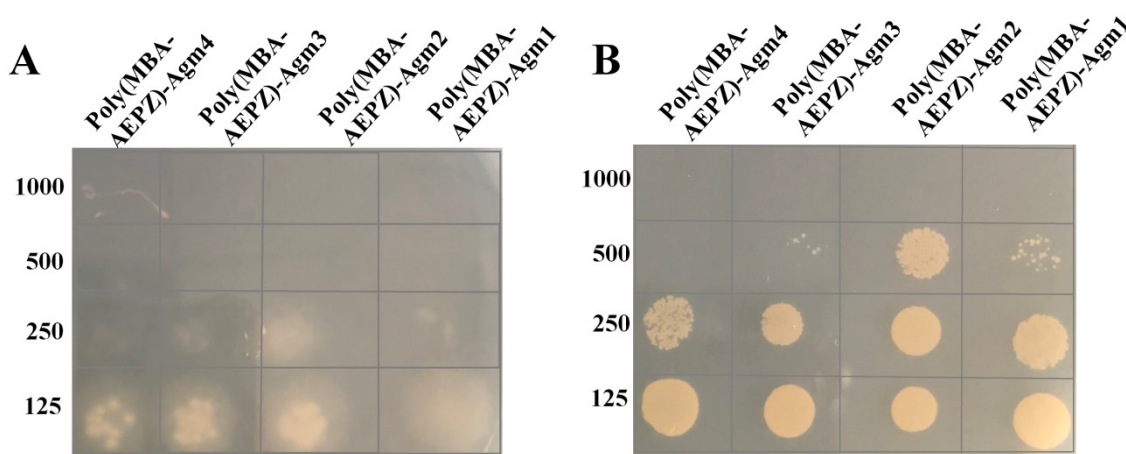

Fig. S2 Colony images of *P. aeruginosa* (A) and *S. aureus* (B) incubated with different poly(MBA-AEPZ)-Agm1.

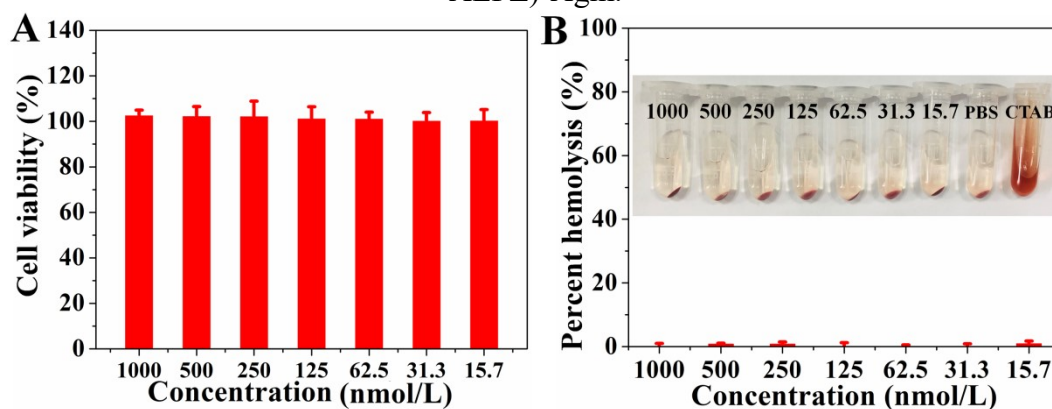

Fig. S3 The viability of RAW264.7 cells (A) and hemolytic activity of red blood cells (B) after being treated with different dosages of poly(MBA-AEPZ)-Agm1.

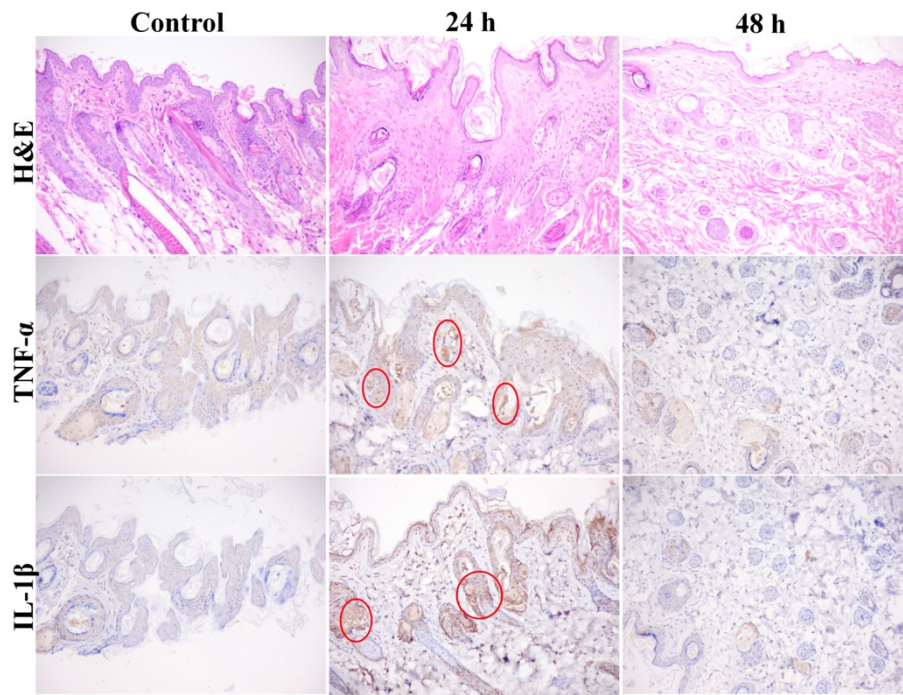

**Fig. S4** The representative images of H&E ( $\times 200$ ) and IHC ( $\times 200$ ) before and after being injected with poly(MBA-AEPZ)-Agm1 for 24 or 48 h.
